# Supplementary material
Source: HighWire-hosted journal article supplement (https://www.annfammed.org/highwire/filestream/7364/field_highwire_adjunct_files/0/Krones__App.pdf)
Supplement: Krones__App.pdf [file Krones__App.pdf]

Krones T, Keller H, Sadowski E, et al. Absolute cardiovascular disease risk and shared decision making in primary care: a randomized controlled trial. *Ann Fam Med*. 2008;6(3):218-227.

<http://www.annfammed.org/cgi/content/full/6/3/218/DC1>

|               |                                                                                                                                                       |                                                                 |            |
|---------------|-------------------------------------------------------------------------------------------------------------------------------------------------------|-----------------------------------------------------------------|------------|
| <b>arriba</b> |                                                                                                                                                       | <b>Absolute and Relative Risk Reduction in General Practice</b> | <b>Men</b> |
| <b>1</b>      | <b>Agreement:</b> determine patient's individual risk for myocardial infarction or stroke, involve the patient in choosing options for risk reduction |                                                                 |            |
| <b>2</b>      | <b>Risk subjective:</b> address patient's fears, expectations, preferences, questions                                                                 |                                                                 |            |
| <b>3.1</b>    | <b>Risk objective:</b> calculate risk and total points                                                                                                |                                                                 |            |

**If manifest atherosclerosis (ie, MI, stroke, PAD)**  
→ **high risk (~ 50% in 10 years). Continue with 3.3**

| Age (years)                            | 20-34                                   | 35-39 | 40-44     | 45-49 | 50-54     | 55-59   | 60-64     | 65-69                                         | 70-74     | 75-79 |      |
|----------------------------------------|-----------------------------------------|-------|-----------|-------|-----------|---------|-----------|-----------------------------------------------|-----------|-------|------|
| <b>Basal risk age</b>                  | -9                                      | -4    | 0         | 3     | 6         | 8       | 10        | 11                                            | 12        | 13    |      |
| <b>Smoker - yes</b>                    | 8                                       |       | 5         |       | 3         |         | 1         |                                               | 1         |       |      |
| <b>Total Cholesterol (mmol/L)</b>      | <4.1                                    | 0     | 0         | 0     | 0         | 0       | 0         | 0                                             | 0         | 0     |      |
|                                        | 4.2 – 5.1                               | 4     | 3         | 3     | 2         | 1       | 1         | 0                                             | 0         | 0     |      |
|                                        | 5.2 – 6.1                               | 7     | 5         | 5     | 3         | 1       | 1         | 0                                             | 0         | 0     |      |
|                                        | 6.2 – 7.1                               | 9     | 6         | 6     | 4         | 2       | 2         | 1                                             | 1         | 1     |      |
|                                        | 7.2 – 8.4                               | 11    | 8         | 8     | 5         | 3       | 3         | 3                                             | 1         | 1     |      |
| >8.5                                   | <b>Familial hyperlipidamia probable</b> |       |           |       |           |         |           |                                               |           |       |      |
| <b>HDL - Cholesterol (mmol/L)</b>      | >1.5                                    |       | 1.3-1.4   |       |           | 1.1-1.2 |           | <1.0                                          |           |       |      |
|                                        | -1                                      |       | 0         |       |           | 1       |           | 2                                             |           |       |      |
| <b>Blood pressure systolic (mm Hg)</b> | <120                                    |       | 120 - 129 |       | 130 - 139 |         | 140 - 159 |                                               | 160 - 179 |       | ≥180 |
| <b>Without antihypertensives</b>       | 0                                       | 0     | 1         | 1     | 2         | 2       | 3         | <b>Lowering of blood pressure recommended</b> |           |       |      |
| <b>With antihypertensives</b>          | 0                                       | 1     | 2         | 2     | 3         | 3       | 3         |                                               |           |       |      |

**3.2 Risk objective:** Compare total risk with population

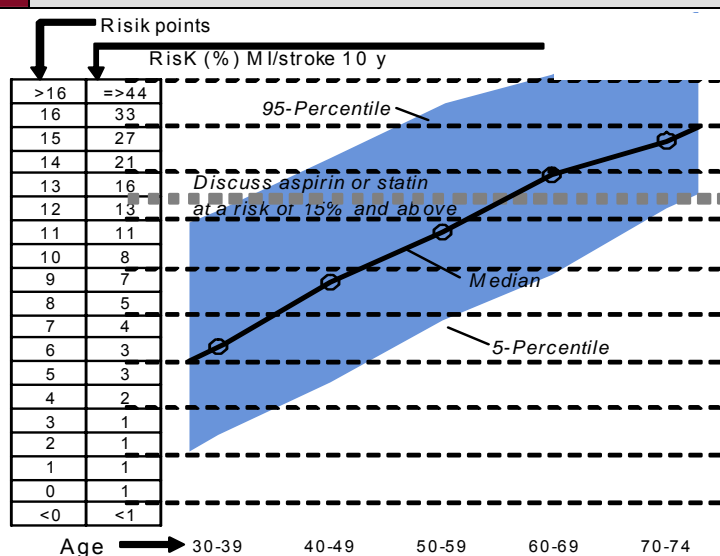

**Additional risks:**

- **Family history**  
If manifest CVD in first-grade relatives (women under 65 y, men under 55 y): => risk x 1.5
- **Diabetes** (if known):  
HbA<sub>1c</sub> <6: risk normal  
HbA<sub>1c</sub> 6.1-8: risk x 1.2  
HbA<sub>1c</sub> 8.1-10: risk x 1.6

**Acknowledgment:**  
N. Donner-Banzhoff, MHS; U. Popert, MD; A. Sönnichsen, MD; Department of Family Practice, University of Marburg

Population data: National Health Survey RKI

Risk equation: Framingham study adapted for ATP III  
Version 4.1 (January 2008)

|               |                                                                                                                                                       |                                                                 |              |
|---------------|-------------------------------------------------------------------------------------------------------------------------------------------------------|-----------------------------------------------------------------|--------------|
| <b>arriba</b> |                                                                                                                                                       | <b>Absolute and Relative Risk Reduction in General Practice</b> | <b>Women</b> |
| <b>1</b>      | <b>Agreement:</b> determine patient's individual risk for myocardial infarction or stroke, involve the patient in choosing options for risk reduction |                                                                 |              |
| <b>2</b>      | <b>Risk subjective:</b> address patient's fears, expectations, preferences, questions                                                                 |                                                                 |              |
| <b>3.1</b>    | <b>Risk objective:</b> calculate risk and total points                                                                                                |                                                                 |              |

**If manifest atherosclerosis (ie, MI, stroke, PAD)**  
 → **high risk (~ 50% in 10 years). Continue with 3.3**

| Age (years)                     | 20-34                            | 35-39     | 40-44     | 45-49     | 50-54     | 55-59                                  | 60-64 | 65-69 | 70-74 | 75-79 |
|---------------------------------|----------------------------------|-----------|-----------|-----------|-----------|----------------------------------------|-------|-------|-------|-------|
| Basal risk age                  | -7                               | -3        | 0         | 3         | 6         | 8                                      | 10    | 12    | 14    | 16    |
| Smoker - yes                    | 9                                |           | 7         |           | 4         |                                        | 2     |       | 1     |       |
| Total Cholesterol (mmol/L)      | <4.1                             | 0         | 0         | 0         | 0         | 0                                      | 0     | 0     | 0     | 0     |
|                                 | 4.2 – 5.1                        | 4         | 3         | 3         | 2         | 2                                      | 1     | 1     | 1     | 1     |
|                                 | 5.2 – 6.1                        | 8         | 6         | 6         | 4         | 4                                      | 2     | 2     | 1     | 1     |
|                                 | 6.2 – 7.1                        | 11        | 8         | 8         | 5         | 5                                      | 3     | 3     | 2     | 2     |
|                                 | 7.2 – 8.4                        | 13        | 10        | 10        | 7         | 7                                      | 4     | 4     | 2     | 2     |
| >8.5                            | Familial hyperlipidamia probable |           |           |           |           |                                        |       |       |       |       |
| HDL - Cholesterol (mmol/L)      | >1.5                             |           | 1.3-1.4   |           | 1.1-1.2   |                                        | <1.0  |       |       |       |
|                                 | -1                               |           | 0         |           | 1         |                                        | 2     |       |       |       |
| Blood pressure systolic (mm Hg) | <120                             | 120 - 129 | 130 - 139 | 140 - 159 | 160 - 179 | ≥180                                   |       |       |       |       |
| Without antihypertensives       | 0                                | 1         | 2         | 3         | 4         | Lowering of blood pressure recommended |       |       |       |       |
| With antihypertensives          | 0                                | 3         | 4         | 5         | 6         |                                        |       |       |       |       |

**3.2 Risk objective:** Compare total risk with population

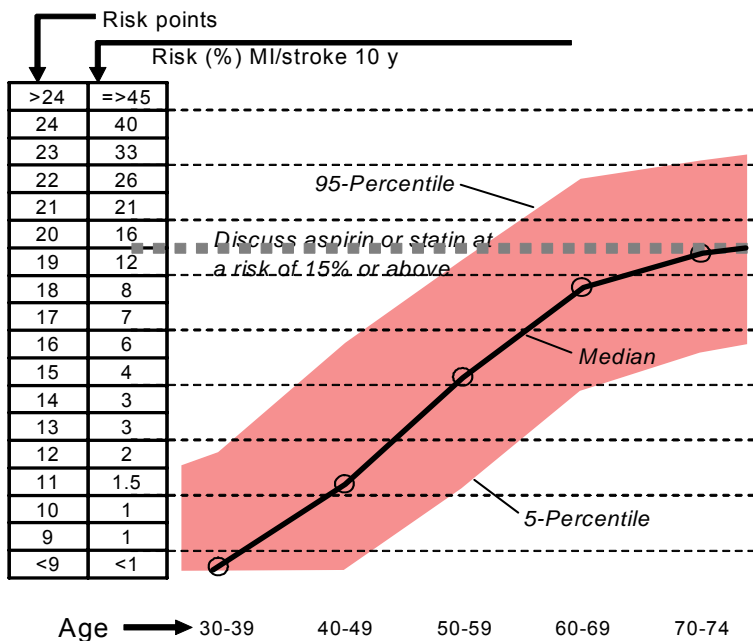

**Additional risks:**

- **Family history**  
If manifest CVD in first-grade relatives (women under 65 y, men under 55 y): => risk x 1.5
- **Diabetes (if known):**  
HbA<sub>1c</sub> < 6: risk normal  
HbA<sub>1c</sub> 6.1-8: risk x 1.2  
HbA<sub>1c</sub> 8.1-10: risk x 1.6

**Acknowledgment:**

N. Donner-Banzhoff, MHSc; U. Popert; MD; A. Sönnichsen, MD; Department of Family Practice, University of Marburg

Population data: National Health Survey RKI

Risk equation: Framingham study adapted for ATP III  
Version 4.1 (January 2008)

|                     |                                             |                  |
|---------------------|---------------------------------------------|------------------|
| arriba <sup>®</sup> | Name: _____<br>Date: _____ Physician: _____ | Counseling sheet |
|---------------------|---------------------------------------------|------------------|

**3.3 Risk objective: Illustration of probability**

Picture 100 people with the same point values as yours. Out of these, in the next 10 years ..... will suffer from or even die due to a heart attack or a stroke; ..... will stay healthy.

If the same 100 people take the same preventive measures over the next 10 years, ..... will not be affected; despite preventive measures ..... will sicken or die.

|                                                                              |  |                                                                                      |
|------------------------------------------------------------------------------|--|--------------------------------------------------------------------------------------|
| <b>Risk points:</b>                                                          |  | 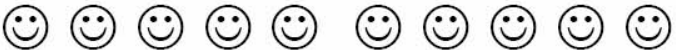   |
| Age:                                                                         |  |    |
| Smoking:                                                                     |  |    |
| Total Cholesterol (mmol/l):                                                  |  |    |
| HDL-Cholesterol (mmol/l):                                                    |  |    |
| Blood pressure (syst.):                                                      |  |    |
| <b>Total:</b>                                                                |  |                                                                                      |
| <b>Additional risks</b> (family history, diabetes – see decision aid part 1) |  |  |
|                                                                              |  |  |
| <b>10 year risk:</b>                                                         |  |  |
|                                                                              |  |  |
|                                                                              |  |  |

**4 Information about options (Prevention)**

| Preventive measures                     | Relative risk reduction | Individual plan |
|-----------------------------------------|-------------------------|-----------------|
| Smoking cessation                       | Approx. 35%             |                 |
| Exercise 2-3x per week > 30 minutes     | Approx. 35%             |                 |
| Fish 2x per week or Omega-3 fatty acids | Approx. 15%             |                 |
| Antihypertensive drugs                  | Approx. 25%             |                 |
| Aspirin 100mg per day                   | Approx. 20%             |                 |
| Statin                                  | Approx. 20-25%          |                 |

**5 Both physician and patient evaluate together options for risk reduction: alternatives, advantages, disadvantages**

**6 Agreement between physician and patient regarding treatment: i.e. behavior modification, medication and follow up**

**Date of follow up?**
